# Supplementary material
Source: publisher site journal article supplement (https://www.spandidos-publications.com/2600/downloadSupplementary)

Figure S1. Impact of miR-22 mimic transfection and sirt1 siRNA on the expression of miR-22 and sirt1 at the mRNA and protein expression levels in osteoblastic MC3T3E1 cells. Osteoblasts were transfected with miR control or miR22 mimic (200 nM) for 24 h. RT-qPCR was performed to measure the expression levels of miR22 (A). Osteoblasts were transfected with control siRNA or sirt1 siRNA for 24 h. RT-qPCR and western blot analyses were performed to determine sirt1 mRNA (B) and protein (C) expression levels, respectively, in osteoblasts. Data are shown as the mean  $\pm$  SEM (n=4). \*\*P<0.01 vs. the control. miR, microRNA; RT-qPCR; reverse transcription PCR; siRNA, small interfering RNA; sirt1, sirtuin 1.

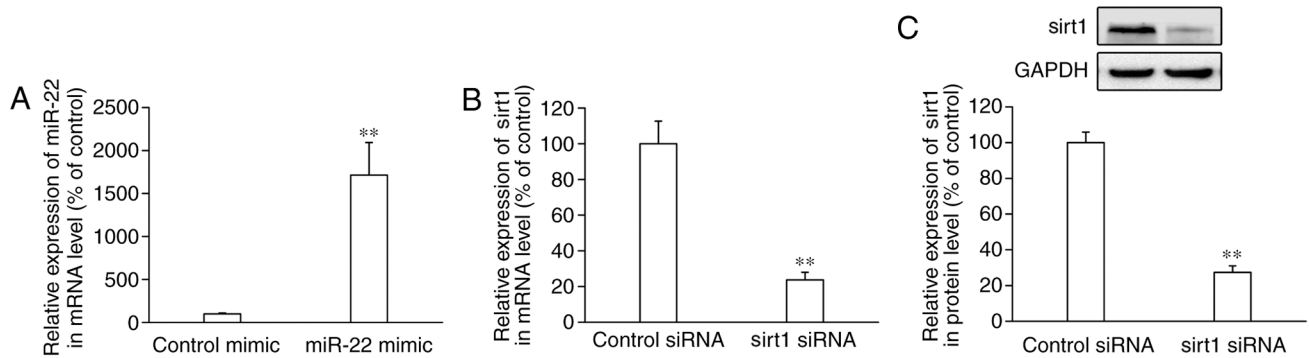

Supplement: Supplementary file 1 [file downloadSupplementary]
